# Supplementary material
Source: publisher figshare collection journal article supplement (https://frontiersin.figshare.com/ndownloader/files/15670322)
Supplement: Supplementary file [file 15670322]

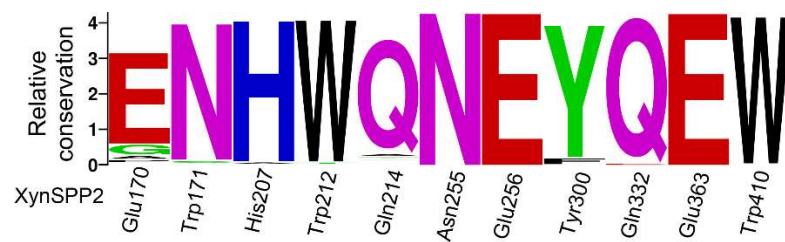

Figure S2. Amino acids in the active-site cleft of GH10 xylanases and their conservations. The size of letter indicates the conservative degree of the give position. The corresponding amino acid residues in XynSPP2 are shown below.
